# Post-Traumatic Stress Disorder (PTSD) Symptoms Predict Delay to Hospital in Patients with Acute Coronary Syndrome

Jonathan D. Newman<sup>1</sup>, Paul Muntner<sup>2</sup>, Daichi Shimbo<sup>1</sup>, Karina W. Davidson<sup>1\*</sup>, Jonathan A. Shaffer<sup>1</sup>, Donald Edmondson<sup>1</sup>

<sup>1</sup> Department of Medicine, Columbia University Medical Center, Columbia University, New York, New York, United States of America, <sup>2</sup> Department of Epidemiology, University of Alabama at Birmingham, Birmingham, Alabama, United States of America

## Abstract

**Background:** Increased delay to hospital presentation with acute coronary syndrome (ACS) is associated with poor outcomes. While demographic factors associated with this delay have been well described, scarce data are available on the role of modifiable factors, such as psychosocial disorders, on pre-hospital delay. Patients with symptoms of post-traumatic stress disorder (PTSD) often avoid stressful situations and may delay presenting for care when they experience cardiac symptoms. It is unknown, however, whether PTSD symptoms negatively impact the time to presentation during an ACS.

**Methods:** We assessed the relationship between PTSD symptoms and pre-hospital delay in 241 adults with an ACS in the ongoing Prescription Use, Lifestyle, Stress Evaluation (PULSE) study.

**Results:** Overall, 66% of patients were male; 40% were Hispanic or Latino. The mean age was  $61.9 \pm 11.6$  years old. PTSD symptoms were present in 17.8% of patients. Pre-hospital delay was longer for patients with PTSD symptoms compared to those without [geometric mean: 25.8 hours (95% CI 13.8 – 44.8) vs. 10.7 hours (95% CI 8.3 – 13.8)];  $P=0.005$ . After multivariable adjustment for age, sex, ethnicity, depression, left ventricular ejection fraction and history of myocardial infarction, the mean pre-hospital delay was 173% (95% CI: 36% – 450%) longer for patients with versus without PTSD symptoms.

**Conclusion:** Among patients presenting with an ACS, PTSD symptoms were independently associated with longer pre-hospital delays. Future studies of pre-hospital delay should examine the mechanisms underlying this association.

**Citation:** Newman JD, Muntner P, Shimbo D, Davidson KW, Shaffer JA, et al. (2011) Post-Traumatic Stress Disorder (PTSD) Symptoms Predict Delay to Hospital in Patients with Acute Coronary Syndrome. PLoS ONE 6(11): e27640. doi:10.1371/journal.pone.0027640

**Editor:** Monica Uddin, Wayne State University, United States of America

**Received:** July 13, 2011; **Accepted:** October 21, 2011; **Published:** November 11, 2011

**Copyright:** © 2011 Newman et al. This is an open-access article distributed under the terms of the Creative Commons Attribution License, which permits unrestricted use, distribution, and reproduction in any medium, provided the original author and source are credited.

**Funding:** This work was supported by grants HL-088117, HL-091099, HL-076857, HL-47540, HL-101663, HL-098037, HL-083056, HL-084438, HL-84034 and T32 HL007854-15 from the National Heart, Lung, and Blood Institute. The project described was also supported by Grant Number UL1 RR024156 from the National Center for Research Resources (NCRR), a component of the National Institutes of Health (NIH) and NIH Roadmap for Medical Research, and its contents are solely the responsibility of the authors and do not necessarily represent the official view of NCRR or NIH. The funders had no role in study design, data collection and analysis, decision to publish or preparation of the manuscript.

**Competing Interests:** The authors have declared that no competing interests exist.

\* E-mail: kd2124@columbia.edu

## Introduction

The association between pre-hospital delay prior to presentation for acute coronary syndromes (ACS) and poor outcomes has been well documented [1,2,3]. Studies have shown associations of older age, female gender and non-white race on longer pre-hospital delay [4,5]. However, these factors are non-modifiable and likely account for only 10–25% of pre-hospital delay [1]. Modifiable characteristics, such as psychosocial factors and their adverse related behaviors, may help explain increases in pre-hospital delay [6,7]. Recent studies have demonstrated that psychosocial factors are under-recognized in ACS; [8] are associated with poor outcomes following myocardial infarction (MI); [6,9,10] and may also influence pre-hospital delay [3,7,11]. Post-traumatic stress disorder (PTSD) is a risk factor for ischemic heart disease [12,13,14], and is associated with poor outcomes after an MI [15], but its effects on

pre-hospital delay have not been examined. As patients with PTSD often avoid threatening or upsetting situations [16,17,18], we hypothesized they might delay presenting for care when they first experience cardiac symptoms. Therefore, we examined the relationship between prior PTSD symptoms and pre-hospital delay in patients with ACS presenting for emergency care.

## Methods

This study received ethics approval by the Institutional Review Board (IRB) of Columbia University Medical Center (# IRB - AAA9286). All patients were recruited from the clinical departments at Columbia University. Written informed consent was obtained from all study patients. Completed informed consent documents were then stored in a secure location as per Columbia University IRB protocol.

## Study Population

Patients were drawn from the Prescription Use, Lifestyle, Stress Evaluation (PULSE) study, an ongoing, single site, observational, prospective study of patients with ACS. All patients presented to the emergency department (ED) of the primary study hospital (Columbia University Medical Center) or to a nearby hospital, and were transferred to Columbia for further care. Of the 495 patients recruited between February 1, 2009 and June 14, 2010, we excluded 159 (32.1%) with direct admissions for cardiac catheterization (no pre-hospital delay because they were scheduled); 53 (9.3%) with incomplete data on symptom onset ( $n = 37$ , 7.5%) or triage time ( $n = 16$ , 2.8%); all patients missing triage time were transferred from outside hospitals with incomplete medical records and, thus, triage time could not be estimated. Finally, 31 (6.3%) patients were excluded for missing data on PTSD symptoms and 11 (2.2%) were excluded for reporting greater than 6 weeks of symptoms. After these exclusions, this analysis included 241 English or Spanish speaking patients,  $\geq 18$  years of age with an ACS, defined by study cardiologists using ACC/AHA research definitions [19].

## Main Outcome Measure

Pre-hospital delay was defined as the time between ACS symptom onset and time of ED triage. Following an approach used in prior studies, trained research staff used standardized questionnaires at the time of study enrollment to assess symptom onset [20,21]. ED triage time was abstracted from the medical record. National guidelines for ED care of patients with chest pain recommend an electrocardiogram (ECG) on presentation or within 10 minutes of triage [22]. Time of first ECG was substituted for presentation time in 15 patients (6.2%) for whom ED triage time was not documented. Among the 226 patients with documented triage ED time, 213 (94%) had a triage to ECG interval of 10 minutes or less.

## Post-traumatic Stress Disorder Symptoms

Patients were screened within 7 days of enrollment for previous traumatic experiences and for the presence of intrusive re-experiencing symptoms of PTSD by trained mental health care professionals, using screening questions from the Structured Clinical Interview for DSM-IV Axis I Disorders-Patient Edition (SCID-I/P, Version 2) [23]. Patients were considered to have symptoms of PTSD if they reported having both a traumatic event (Criterion A) and intrusive re-experiencing of that event (Criterion B) prior to their MI. In previous research, positive symptoms for both Criterion A and B correctly identified 97% of PTSD cases [24].

## Covariates

Age, gender, and ethnicity (Hispanic or Latino vs. other) were obtained from patient interview. History of prior MI and left-ventricular ejection fraction (LVEF) during admission was determined from the medical chart. As prior studies have suggested depression and social support influence pre-hospital delay [7,11,20], these psychosocial factors were included as covariates. Depressive symptoms were assessed using the Beck Depression Inventory (BDI) [25,26]. Higher BDI scores represent greater depressive symptomatology, and patients with a score  $\geq 10$  were considered to have clinically significant depression [26]. Low perceived social support (LPSS) was defined using the ENRICH Social Support Instrument (ESSI) [26].

## Statistical Analysis

Included patients were compared on baseline characteristics to those excluded for incomplete data. Next, baseline characteristics

were calculated, overall, for patients with and without PTSD symptoms. These groups were then compared using chi-square tests for categorical data and two sample t-tests for continuous variables. As in prior studies [2,27], pre-hospital delay was positively skewed and was log-transformed for analysis. We calculated the geometric mean duration of pre-hospital delay by levels of each covariate and for patients with and without PTSD symptoms. The association between PTSD symptoms and pre-hospital delay was examined in unadjusted and age, gender and ethnicity-adjusted linear regression models. Further adjustment was performed with the addition of psychosocial (depression, LPSS) and cardiovascular (LVEF, prior MI) covariates to the age, gender and ethnicity-adjusted model. Log-transformed pre-hospital delay time was used in regression models; therefore, increases in delay are presented as percentages (ratios). Finally, to clarify the relationship between trauma exposure, PTSD symptoms and pre-hospital delay, a sensitivity analysis restricted to patients reporting prior exposure to traumatic events was performed. Specifically, among patients with exposure to traumatic events, we compared pre-hospital delay for patients with and without PTSD symptoms. All analyses were performed using SPSS, version 18 (SPSS Inc., Chicago, Illinois).

## Results

There were no significant differences in the baseline characteristics of Table 1 between the included patients ( $N = 241$ ) and those excluded for incomplete data ( $n = 95$ ). Patients with PTSD symptoms ( $n = 43$ , 18%) versus those without ( $n = 198$ ; 82%) were younger (mean age: 58.1 vs. 62.8 years), more likely to be depressed (70% vs. 37%), and had a higher LVEF (53.0% vs. 46.1%) (Table 1). Differences in delay time across age, gender, ethnicity, hospital presented to, prior MI, depression, LVEF, and perceived social support were not statistically significant (each  $p > 0.10$ ; Table 2). Pre-hospital delay was longer for patients with PTSD symptoms compared to those without (Figure 1, geometric mean: 25.8 hours [95% CI 14.9 – 44.8] vs. 10.7 hours [95% CI 8.3 – 13.8]  $P = 0.005$ ). After age, sex, and ethnicity adjustment, patients with PTSD symptoms had a 163% (95% CI: 43% – 385%) longer pre-hospital delay (Table 3). After further adjustment for depression, LVEF, prior MI and LPSS, the mean pre-hospital delay was 173% (95% CI: 36% – 450%) longer for patients who had symptoms of PTSD.

The sensitivity analysis consisted of 112 (46%) patients reporting prior traumatic events. Among these trauma-exposed patients, those with PTSD symptoms ( $n = 43$ ), compared to those without PTSD symptoms ( $n = 69$ ), were younger (mean age: 58.1 vs. 60.2 years), more likely to be depressed (70% vs. 35%), and had a higher LVEF (52.7% vs. 48.7%). The unadjusted pre-hospital delay time remained significantly longer for patients with PTSD symptoms when compared to trauma-exposed patients without PTSD symptoms (geometric mean: 25.8 hours [95% CI 14.9 – 44.8] vs. 6.9 hours [95% CI 4.6 – 10.2]  $P < 0.001$ ). After adjustment for age, sex, ethnicity, depression, LPSS, prior MI and LVEF, the mean pre-hospital delay was 278% (95% CI: 69% – 745%) longer for patients with PTSD symptoms.

## Discussion

In the current study, ACS patients with prior PTSD symptoms took more than two and a half times as long to present to the ED than did patients without PTSD symptoms. This association was present in an unadjusted model and in a model adjusted for both psychosocial and cardiovascular covariates. The reasons for the observed association between PTSD symptoms and increased

**Table 1.** Characteristics of Patients by PTSD Symptoms.

| Variable                                  | Overall<br>N = 241 | PTSD<br>Symptoms n = 43 | No PTSD<br>Symptoms = 198 | P-value* |
|-------------------------------------------|--------------------|-------------------------|---------------------------|----------|
| Age, years                                | 61.9±11.6          | 58.1±11.7               | 62.7±11.4                 | 0.02     |
| Male, %                                   | 66                 | 61                      | 67                        | 0.40     |
| Hispanic or Latino, %                     | 40                 | 40                      | 40                        | 0.92     |
| Presentation to Columbia University, %    | 56                 | 51                      | 57                        | 0.48     |
| Depression†, %                            | 43                 | 70                      | 37                        | <0.01    |
| Myocardial Infarction, %                  | 63                 | 58                      | 64                        | 0.31     |
| Prior Myocardial Infarction, %            | 27                 | 32                      | 26                        | 0.29     |
| Left Ventricular Ejection Fraction <40, % | 17                 | 8                       | 21                        | 0.04     |
| Left Ventricular Ejection Fraction        | 48.5±12.1          | 53.0±10.1               | 46.1±12.3                 | 0.01     |
| Low Perceived Social Support, %           | 8                  | 7                       | 8                         | 0.91     |

Abbreviations: PTSD, post-traumatic stress disorder.

\*Data are presented as percentage or mean ± S.D. comparing patients with and without PTSD symptoms.

†Depressive Symptoms defined as a Beck Depression Index (BDI) score ≥10.

doi:10.1371/journal.pone.0027640.t001

**Table 2.** Geometric Mean Pre-hospital Delay by Patient Characteristics.

| Variable                            | Delay in Hours (95% C.I.) | P-value |
|-------------------------------------|---------------------------|---------|
| <b>Age, years</b>                   |                           |         |
| <65                                 | 12.2 (9.1 – 16.4)         | 0.53    |
| ≥65                                 | 13.1 (8.8 – 19.3)         |         |
| <b>Gender</b>                       |                           |         |
| Male                                | 13.4 (10.0 – 17.9)        | 0.44    |
| Female                              | 11.0 (7.4 – 16.4)         |         |
| <b>Ethnicity</b>                    |                           |         |
| Hispanic or Latino                  | 10.0 (6.9 – 14.4)         | 0.12    |
| Not Hispanic or Latino              | 14.6 (10.7 – 19.8)        |         |
| <b>Hospital Presentation</b>        |                           |         |
| Columbia University                 | 12.4 (9.0 – 17.0)         | 0.91    |
| Other                               | 12.7 (9.0 – 18.0)         |         |
| <b>Prior MI</b>                     |                           |         |
| Yes                                 | 11.9 (7.5 – 18.7)         | 0.69    |
| No                                  | 13.2 (10.0 – 17.5)        |         |
| <b>Depression†</b>                  |                           |         |
| Yes                                 | 11.5 (8.4 – 15.6)         | 0.41    |
| No                                  | 14.0 (9.7 – 20.2)         |         |
| <b>LVEF ≤40%</b>                    |                           |         |
| Yes                                 | 14.3 (8.2 – 24.9)         | 0.40    |
| No                                  | 11.0 (8.4 – 14.4)         |         |
| <b>Low perceived social support</b> |                           |         |
| Yes                                 | 11.7 (4.8 – 28.5)         | 0.84    |
| No                                  | 12.8 (10.0 – 16.4)        |         |

Abbreviations: MI, myocardial infarction. ACS, acute coronary syndrome. LVEF, left ventricular ejection fraction. CI, confidence interval.

†Depression defined as a BDI score ≥10.

doi:10.1371/journal.pone.0027640.t002

delay to hospital presentation are not known. The diaphoresis, dyspnea, and tachycardia associated with PTSD may mimic ACS symptoms [28]. The self-regulatory model of behavior suggests that the cognitive and emotional representation of symptoms by PTSD patients may differ from those of non-PTSD patients, and lead to increased pre-hospital delay [29]. Also, behavioral avoidance of potentially threatening or arousing situations has been noted in patients with PTSD [16,17,18], and may partially explain the observed delay in presentation. It is important to note that the association between PTSD symptoms and pre-hospital delay remained after the exclusion of patients without trauma exposure from the analyses. This finding suggests that it is PTSD symptomatology – and not just the experience of traumatic events – that may increase pre-hospital delay.

The more than 10-hour longer pre-hospital delay observed, on average, in patients with prior PTSD symptoms may have clinical implications, as even a 30-minute longer delay has been associated with higher 1-year mortality rates [30]. Prior studies have suggested anxiety may be associated with an intent to delay hospital presentation [7], and it is possible that anxiety disorders, including PTSD, may represent a category of heretofore neglected modifiable factors important to pre-hospital delay.

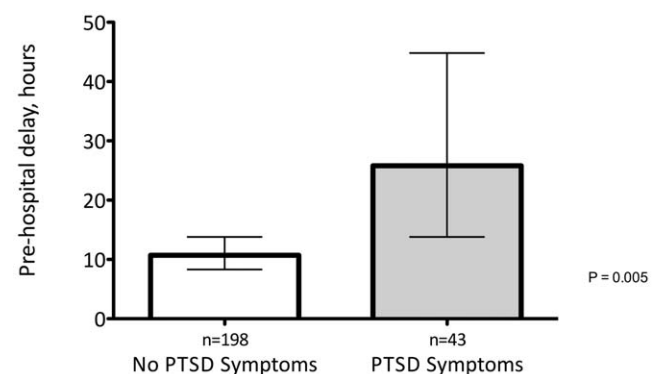**Figure 1. Geometric Mean Pre-hospital Delay by PTSD symptoms.**  $P=0.005$  for difference in pre-hospital delay PTSD, Post-traumatic Stress Disorder.

doi:10.1371/journal.pone.0027640.g001

**Table 3.** Difference in Pre-hospital Delay with vs. without PTSD Symptoms.

| Model | Covariate adjustment                         | Percent delay (95% CI) PTSD Symptoms vs. No PTSD Symptoms | P-value |
|-------|----------------------------------------------|-----------------------------------------------------------|---------|
| 1:    | Unadjusted                                   | 142% longer (32% to 343%)                                 | 0.005   |
| 2:    | Age, sex, ethnicity                          | 163% longer (43% to 385%)                                 | 0.002   |
| 3:    | Model 2 and depression, LVEF, prior MI, LPSS | 173% longer (36% to 450%)                                 | 0.005   |

Abbreviations: PTSD, post-traumatic stress disorder. CI, confidence interval. LVEF, left ventricular ejection fraction.

MI, myocardial infarction. LPSS, low perceived social support.

doi:10.1371/journal.pone.0027640.t003

Few studies investigating the role of psychosocial factors on pre-hospital delay have been published [6,7]. In our study, patients with PTSD symptoms were more likely have symptoms of depression (70% versus 37% for those without PTSD). However, in contrast to prior studies [7,11], the relationship we found between depressive symptoms and pre-hospital delay was small and not statistically significant. Prior studies that reported this association did not control for PTSD, indicating the effects of PTSD versus depression on pre-hospital delay may require further examination.

The limitations of our study include the relatively small sample size; the lack of a diagnostic PTSD assessment or a measure of symptom severity; and possible confounding by insurance status, which has been associated with pre-hospital delay [3]. However, the PTSD screening items used (history of traumatic event(s) and intrusive re-experiencing) correctly identify a high percentage of cases of PTSD [24,31], which has been associated with adverse health outcomes. Future studies should include a diagnostic assessment for PTSD and evaluate the relationship between symptom severity and pre-hospital delay. If the association between PTSD symptoms and longer pre-hospital delay is

confirmed in additional studies, trials to assess the impact of PTSD treatment on shortening pre-hospital delay may be warranted. This may have additional importance, as recent studies have suggested the prevalence of combat PTSD may be increasing [32], and have linked PTSD to atherosclerotic burden [14]. More broadly, future studies of psychosocial factors and pre-hospital delay may help guide interventions to shorten the time taken by patients to present with an ACS, as prior interventions without these factors have been largely unsuccessful [27,33].

In conclusion, this study suggests that patients with PTSD symptoms may delay presenting for emergency care during an ACS event, and may represent a uniquely vulnerable population.

## Acknowledgments

The authors would like to thank study patients and their families for their participation.

## Author Contributions

Analyzed the data: JDN KWD DE. Wrote the paper: JDN PM DS KWD JAS DE.

## References

- Ting HH, Bradley EH, Wang Y, Lichtman JH, Nallamothu BK, et al. (2008) Factors associated with longer time from symptom onset to hospital presentation for patients with ST-elevation myocardial infarction. *Arch Intern Med* 168: 959–968.
- Ting HH, Chen AY, Roe MT, Chan PS, Spertus JA, et al. (2010) Delay From Symptom Onset to Hospital Presentation for Patients With Non-ST-Segment Elevation Myocardial Infarction. *Arch Intern Med* 170: 1834–1841.
- Smolderen KG, Spertus JA, Nallamothu BK, Krumholz HM, Tang FM, et al. (2010) Health Care Insurance, Financial Concerns in Accessing Care, and Delays to Hospital Presentation in Acute Myocardial Infarction. *J Am Med Assoc* 303: 1392–1400.
- Nguyen HL, Saczynski JS, Gore JM, Goldberg RJ (2010) Age and Sex Differences in Duration of Prehospital Delay in Patients With Acute Myocardial Infarction A Systematic Review. *Circ Cardiovasc Qual Outcomes* 3: 82–92.
- Goldberg RJ, Steg PG, Sadiq I, Granger CB, Jackson EA, et al. (2002) Extent of, and factors associated with, delay to hospital presentation in patients with acute coronary disease (The GRACE Registry). *Am J Cardiol* 89: 791–796.
- Dracup K (2009) The Challenge of Reducing Prehospital Delay in Patients With Acute Coronary Syndrome. *Circ Cardiovasc Qual Outcomes* 2: 144–145.
- Sullivan MD, Ciechanowski PS, Russo JE, Soine LA, Jordan-Keith K, et al. (2009) Understanding Why Patients Delay Seeking Care for Acute Coronary Syndromes. *Circ Cardiovasc Qual Outcomes* 2: 148–154.
- Figueredo VM (2009) The Time Has Come for Physicians to Take Notice: The Impact of Psychosocial Stressors on the Heart. *The American Journal of Medicine* 122: 704–712.
- Strik JJMH, Denollet J, Lousberg R, Honig A (2003) Comparing symptoms of depression and anxiety as predictors of cardiac events and increased health care consumption after myocardial infarction. *J Am Coll Cardiol* 42: 1801–1807.
- Lichtman JH, Bigger JT, Jr., Blumenthal JA, Frasure-Smith N, Kaufmann PG, et al. (2008) Depression and Coronary Heart Disease: Recommendations for Screening, Referral, and Treatment. *Circulation* 118: 1768–1775.
- Bunde J, Martin R (2006) Depression and prehospital delay in the context of myocardial infarction. *Psychosom Med* 68: 51–57.
- Walczewska J, Rutkowski K, Wizner B, Cwynar M, Grodzicki T (2010) Stiffness of large arteries and cardiovascular risk in patients with post-traumatic stress disorder. *Eur Heart J* 32: 730–736.
- Kubzansky LD, Koenen KC, Spiro A, 3rd, Vokonas PS, Sparrow D (2007) Prospective study of posttraumatic stress disorder symptoms and coronary heart disease in the Normative Aging Study. *Arch Gen Psychiatry* 64: 109–116.
- Ahmadi N, Hajsadeghi F, Mirshkarlo HB, Budoff M, Yehuda R, et al. (2011) Post-traumatic Stress Disorder, Coronary Atherosclerosis, and Mortality. *Am J Cardiol In Press*.
- Shemesh E, Yehuda R, Milo O, Dinur I, Rudnick A, et al. (2004) Posttraumatic stress, nonadherence, and adverse outcome in survivors of a myocardial infarction. *Psychosom Med* 66: 521–526.
- Amir M, Kaplan Z, Efroni R, Levine Y, Benjamin J, et al. (1997) Coping styles in post-traumatic stress disorder (PTSD) patients. *Personality and Individual differences* 23: 399–405.
- Chang CM, Lee LC, Connor KM, Davidson JRT, Jeffries K, et al. (2003) Posttraumatic distress and coping strategies among rescue workers after an earthquake. *J Nerv Ment Dis* 191: 391–398.
- Valentiner DP, Foa EB, Riggs DS, Gershuny BS (1996) Coping strategies and posttraumatic stress disorder in female victims of sexual and nonsexual assault. *Journal of Abnormal Psychology* 105: 455–458.
- Cannon CP, Battler A, Brindis RG, Cox JL, Ellis SG, et al. (2001) American College of Cardiology key data elements and definitions for measuring the clinical management and outcomes of patients with acute coronary syndromes. A report of the American College of Cardiology Task Force on Clinical Data Standards (Acute Coronary Syndromes Writing Committee). *J Am Coll Cardiol* 38: 2114–2130.
- Dracup K, Moser DK (1997) Beyond sociodemographics: factors influencing the decision to seek treatment for symptoms of acute myocardial infarction. *Heart Lung* 26: 253–262.
- King KB, McGuire MA (2007) Symptom presentation and time to seek care in women and men with acute myocardial infarction. *Heart Lung* 36: 235–243.
- Braunwald E, Antman EM, Beasley JW, Califf RM, Cheitlin MD, et al. (2000) ACC/AHA guidelines for the management of patients with unstable angina and non-ST-segment elevation myocardial infarction. A report of the American College of Cardiology/American Heart Association Task Force on Practice Guidelines (Committee on the Management of Patients With Unstable Angina). *J Am Coll Cardiol* 36: 970–1062.

23. First M, Spitzer R, Gibbon M, Williams J (1995) Structured clinical interview for DSM-IV axis I disorders-patient edition (SCID-I/P, Version 2.0). Biometric Research, New York State Psychiatric Institute, New York.
24. Franklin CL, Sheeran T, Zimmerman M (2002) Screening for trauma histories, posttraumatic stress disorder (PTSD), and subthreshold PTSD in psychiatric outpatients. *Psychol Assessment* 14: 467–471.
25. Beck AT, Rush AJ, Shaw BF, Emery G (1979) *Cognitive Therapy of Depression*. New York: The Guilford Press.
26. Writing committee for the ENRICHD Investigators (2003) Effects of Treating Depression and Low Perceived Social Support on Clinical Events After Myocardial Infarction. *J Am Med Assoc* 289: 3106–3116.
27. Dracup K, McKinley S, Riegel B, Moser DK, Meischke H, et al. (2009) A Randomized Clinical Trial to Reduce Patient Prehospital Delay to Treatment in Acute Coronary Syndrome. *Circ Cardiovasc Qual Outcomes* 2: 524–532.
28. Bedi US, Arora R (2007) Cardiovascular manifestations of posttraumatic stress disorder. *J Nat Med Assoc* 99: 642–649.
29. Walsh JC, Lynch M, Murphy AW, Daly K (2004) Factors influencing the decision to seek treatment for symptoms of acute myocardial infarction: an evaluation of the Self-Regulatory Model of illness behaviour. *J Psychosom Res* 56: 67–73.
30. De Luca G, Suryapranata H, Ottervanger JP, Antman EM (2004) Time delay to treatment and mortality in primary angioplasty for acute myocardial infarction: every minute of delay counts. *Circulation* 109: 1223–1225.
31. Elhai JD, Franklin CL, Gray MJ (2008) The SCID PTSD module's trauma screen: validity with two samples in detecting trauma history. *Depress Anxiety* 25: 737–741.
32. Ramchand R, Schell TL, Karney BR, Osilla KC, Burns RM, et al. (2010) Disparate prevalence estimates of PTSD among service members who served in Iraq and Afghanistan: possible explanations. *Journal of traumatic stress* 23: 59–68.
33. Luepker RV, Raczynski JM, Osganian S, Goldberg RJ, Finnegan JR, Jr., et al. (2000) Effect of a community intervention on patient delay and emergency medical service use in acute coronary heart disease: The Rapid Early Action for Coronary Treatment (REACT) Trial. *J Am Med Assoc* 284: 60–67.
